# Supplementary material
Source: PubMed Central journal article supplement (PMC4893000)
Supplement: NIHMS778543-supplement-8.pdf [file NIHMS778543-supplement-8.pdf]

**Acquired tissue-specific promoter bivalency is a  
basis for PRC2 necessity in adult somatic cells**

Unmesh Jadhav, Kodandaramireddy Nalapareddy, Madhurima Saxena, Nicholas K. O'Neill,  
Luca Pinello, Guo-Cheng Yuan, Stuart H. Orkin, Ramesh A. Shivdasani

**SUPPLEMENTAL MATERIALS**

**Supplemental Experimental Procedures:** Mice and cell isolation; Histology and detection of proteins; Details of ChIP-seq analysis; Published data on gene expression and histone modifications.

**Table S1.** Summary of ChIP-seq and RNA-seq experiments.

**Supplemental References**

## SUPPLEMENTAL EXPERIMENTAL PROCEDURES

**Mice and cell isolation.** Animals were housed under specific pathogen-free conditions and handled according to protocols approved by the Dana-Farber Cancer Institute's Animal Care and Use Committee. Secretory progenitors (from intestinal crypts of mice ~38 h after treatment with the Notch inhibitor dibenzazepine) and enterocyte progenitors (from crypts of *Atoh1*<sup>-/-</sup> small intestines, which lack all secretory cells) were generated and isolated as described previously (Kim et al., 2014).

**Histology and detection of proteins.** Tissues fixed overnight in 4% paraformaldehyde at 4°C were washed in PBS, dehydrated in ethanol, embedded in paraffin, and used to prepare 5 µm sections that were deparaffinized, rehydrated, and stained with hematoxylin and eosin or with the alkaline phosphatase substrate nitro blue tetrazolium/5-bromo-4-chloro-3-indolyl-phosphate (Sigma B5655). Following antigen retrieval in 10 mM sodium citrate buffer (pH 6), tissue sections were incubated overnight at 4°C with EZH2 (Cell Signaling 5246, 1:500), H3K27me3 (Millipore 07-449, 1:1000), BrdU (AbD Serotec OBT0030CX) or KI67 (Vector VP-K452) antibodies (Ab) in PBS, followed by anti-rabbit, anti-rat or anti-mouse IgG conjugated to Cy3 or biotin (Jackson Laboratories, 1:1000), and detection by fluorescence or by staining with Vectastain Elite ABC Kit (Vector) and 3,3' diaminobenzidine tetrahydrochloride (Sigma P8375). Crypts and villi, isolated without digestion or flow sorting, were lysed in Triton Extraction Buffer (TEB) containing 0.5% Triton-X100 and 2 mM phenylmethylsulfonylfluoride (PMSF) in PBS for 10 min. Cell pellets were incubated overnight in 0.2 N HCl at 4°C and extracted histones were immunoblotted with H3K27me3 (Millipore 07-449, 1:1000) and Histone3 (Cell Signaling 9715S, 1:1000) Ab.

**ChIP-seq.** To detect H3K27me3 and Pol2, villus epithelial cells and ISC were cross-linked for 25 min with 1% formaldehyde, washed in cold PBS, and resuspended in 50 mM Tris-HCl (pH 8), 10 mM EDTA, 1% SDS, and protease inhibitors (Roche). Chromatin fragments (200-500 bp) obtained by sonication (Covaris) were resuspended in 150 mM NaCl, 20 mM Tris-HCl (pH 8), 2 mM EDTA, and 1% Triton X-100, then incubated overnight at 4°C with magnetic beads (Dyna) conjugated to H3K27me3 (Millipore 07-449) or Pol2 (Santa Cruz SC-899) Ab. Beads were washed, DNA was eluted, and cross-links were reversed in 1% SDS and 0.1 M NaHCO<sub>3</sub> for 6 h at 65°C. DNA was purified using a kit (Qiagen).

Other studies mapped H3K27me3 and H3K4me2 in secretory and enterocyte progenitors, isolated from mouse intestinal crypts, and in wild-type villus epithelial cells prepared as described above. In these experiments, cells were digested with 0.2 U micrococcal nuclease (Sigma N3755) at 37°C for 6 min in 50 mM Tris-HCl (pH 7.6), 1 mM CaCl<sub>2</sub>, 0.2% Triton X-100, protease inhibitors (Roche), and 0.5 mM PMSF. The nucleosome suspension was dialyzed against RIPA buffer (50 mM HEPES (pH 7.6), 1 mM EDTA, 0.7% Na deoxycholate, 1% NP-40, 0.5 M LiCl) for 3 h at 4°C, isolated by centrifugation, and incubated overnight at 4°C with magnetic beads (Dyna) conjugated to H3K27me3 (Millipore 07-449), H3K4me2 (Millipore 07-030) or H3K4me3 (Abcam ab8580) Ab. After CHIP, beads were washed 4 times in RIPA buffer and twice in 10 mM Tris-HCL (pH 8) and 1 mM EDTA. The mononucleosome fraction of eluted DNA was isolated using 2% E-gel (Invitrogen).

In all cases, libraries were prepared from the CHIP material using the ThruPLEX DNA-seq kit (Rubicon) and sequenced on Illumina HiSeq 2000 (50-bp reads) or NextSeq 500 (75-bp reads) instruments. Unique CHIP-seq reads were aligned to the mouse genome (Mm9, NCBI build 37) using Bowtie2. Raw files were filtered to remove PCR duplicates and reads that aligned to multiple locations. Library information is provided in Table S1. Mapped regions were visualized using the Integrated Genomics Viewer (IGV 2.3 (Robinson et al., 2011)). To compensate for differences in sequencing depth of multiple H3K27me3 CHIP-seq libraries, we down-sampled the larger libraries to the depth of the smallest library using Downsample BAM tool (version 1.136.0) in Galaxy Tools (<https://usegalaxy.org>) and generated wiggle files for visualization using bamCoverage tool in the DeepTools package (Ramirez et al., 2014). For quantitative comparison of H3K27me3 signals within cell types, libraries were normalized through the DiffReps pipeline (Shen et al., 2013), which uses a window-based approach and calculates library normalization factors as the median of region-wise normalization ratios after removing from all libraries the regions with low counts.

**Published data on gene expression and histone modifications.** We used CHIP- and RNA-seq datasets from the skin (matrix cells), blood (LSK cells), and undifferentiated ESCs. Raw data (FASTQ or BAM files) from the following datasets in the Gene Expression Omnibus (GEO, <http://www.ncbi.nlm.nih.gov/geo/>) were used in the analysis:

*Skin (matrix cells)* - CHIPseq (H3K4me3, H3K27me3): GSE31239 (Lien et al., 2011), RNA-seq: GSE61505 (Genander et al., 2014), Gene expression in Ezh1/2 KO mice: GSE26616 (Ezhkova et al., 2011).

*Blood (LSK Cells)* - CHIPseq (H3K4me3, H3K27me3) GSE43007 (Hasemann et al., 2014),

RNA-seq: GSE60101 (Lara-Astiaso et al., 2014), Gene expression in Eed KO LT-HSCs:  
GSE51084 (Xie et al., 2014).

*ES cells* - ChIPseq (H3K4me3, H3K27me3): GSE40065 (Subramanian et al., 2013), GSE43229  
(Das et al., 2014), and GSE58391 (Shpargel et al., 2014); SUZ12 ChIP-seq: GSE58019 (Riising  
et al., 2014).

**Table S1****Summary of ChIP-seq and RNA-seq experiments**

(Related to Figures 1, 2, 3, 5, 6, 7)

| <b>Cell Type</b>           | <b>Experiment</b>           | <b>Uniquely mapped reads</b> | <b>GEO accession</b> |
|----------------------------|-----------------------------|------------------------------|----------------------|
| WT ISC Replicate-1         | H3K27me3 ChIP (Sonicated)   | 17,357,789                   | GSM1843532           |
| WT ISC Replicate-2         | H3K27me3 ChIP (Sonicated)   | 49,35,8827                   | GSM2065674           |
| WT Villus Replicate-1      | H3K27me3 ChIP (Sonicated)   | 16,558,898                   | GSM1843530           |
| WT Villus Replicate-2      | H3K27me3 ChIP (Sonicated)   | 42,799,090                   | GSM2065675           |
| WT Villus Replicate-3      | H3K27me3 ChIP (Sonicated)   | 65,114,772                   | GSM2065676           |
| WT Villus                  | H3K4me3 ChIP (MNase)        | 17,587,823                   | GSM1843531           |
| WT Enterocyte Progenitors  | H3K27me3 ChIP (MNase)       | 22,439,356                   | GSM2065679           |
| WT Enterocyte Progenitors  | H2K4me2 ChIP (MNase)        | 26,163,006                   | GSM2065681           |
| WT Secretory Progenitors   | H3K27me3 ChIP (MNase)       | 26,739,653                   | GSM2065680           |
| WT Secretory Progenitors   | H2K4me2 ChIP (MNase)        | 34,059,738                   | GSM2065682           |
| WT Villus Replicate-1      | RNA Pol-II ChIP (Sonicated) | 35,85,3219                   | GSM2065677           |
| WT Villus Replicate-2      | RNA Pol-II ChIP (Sonicated) | 34,99,8477                   | GSM2065678           |
| WT ISC Replicate-1         | RNA-seq                     | 27,294,167                   | GSM1843524           |
| WT ISC Replicate-2         | RNA-seq                     | 20,834,649                   | GSM1843525           |
| WT ISC Replicate-3         | RNA-seq                     | 48,980,494                   | GSM1843526           |
| WT Villus Replicate-1      | RNA-seq                     | 27,811,300                   | GSM1843521           |
| WT Villus Replicate-2      | RNA-seq                     | 27,687,974                   | GSM1843522           |
| WT Villus Replicate-3      | RNA-seq                     | 23,148,182                   | GSM1843523           |
| Eed -/- Villus Replicate-1 | RNA-seq                     | 23,308,614                   | GSM1843527           |
| Eed -/- Villus Replicate-2 | RNA-seq                     | 23,540,166                   | GSM1843528           |
| Eed -/- Villus Replicate-3 | RNA-seq                     | 31,315,825                   | GSM1843529           |

## SUPPLEMENTAL REFERENCES

Genander, M., Cook, P.J., Ramskold, D., Keyes, B.E., Mertz, A.F., Sandberg, R., and Fuchs, E. (2014). BMP signaling and its pSMAD1/5 target genes differentially regulate hair follicle stem cell lineages. *Cell Stem Cell* *15*, 619-633.

Lara-Astiaso, D., Weiner, A., Lorenzo-Vivas, E., Zaretzky, I., Jaitin, D.A., David, E., Keren-Shaul, H., Mildner, A., Winter, D., Jung, S., *et al.* (2014). Immunogenetics. Chromatin state dynamics during blood formation. *Science* *345*, 943-949.

Robinson, J.T., Thorvaldsdottir, H., Winckler, W., Guttman, M., Lander, E.S., Getz, G., and Mesirov, J.P. (2011). Integrative genomics viewer. *Nat Biotechnol* *29*, 24-26.

Supek, F., Bosnjak, M., Skunca, N., and Smuc, T. (2011). REVIGO summarizes and visualizes long lists of gene ontology terms. *PLoS One* *6*, e21800.
