# Supplementary material
Source: PubMed Central journal article supplement (PMC4893000)

**Figure S1**

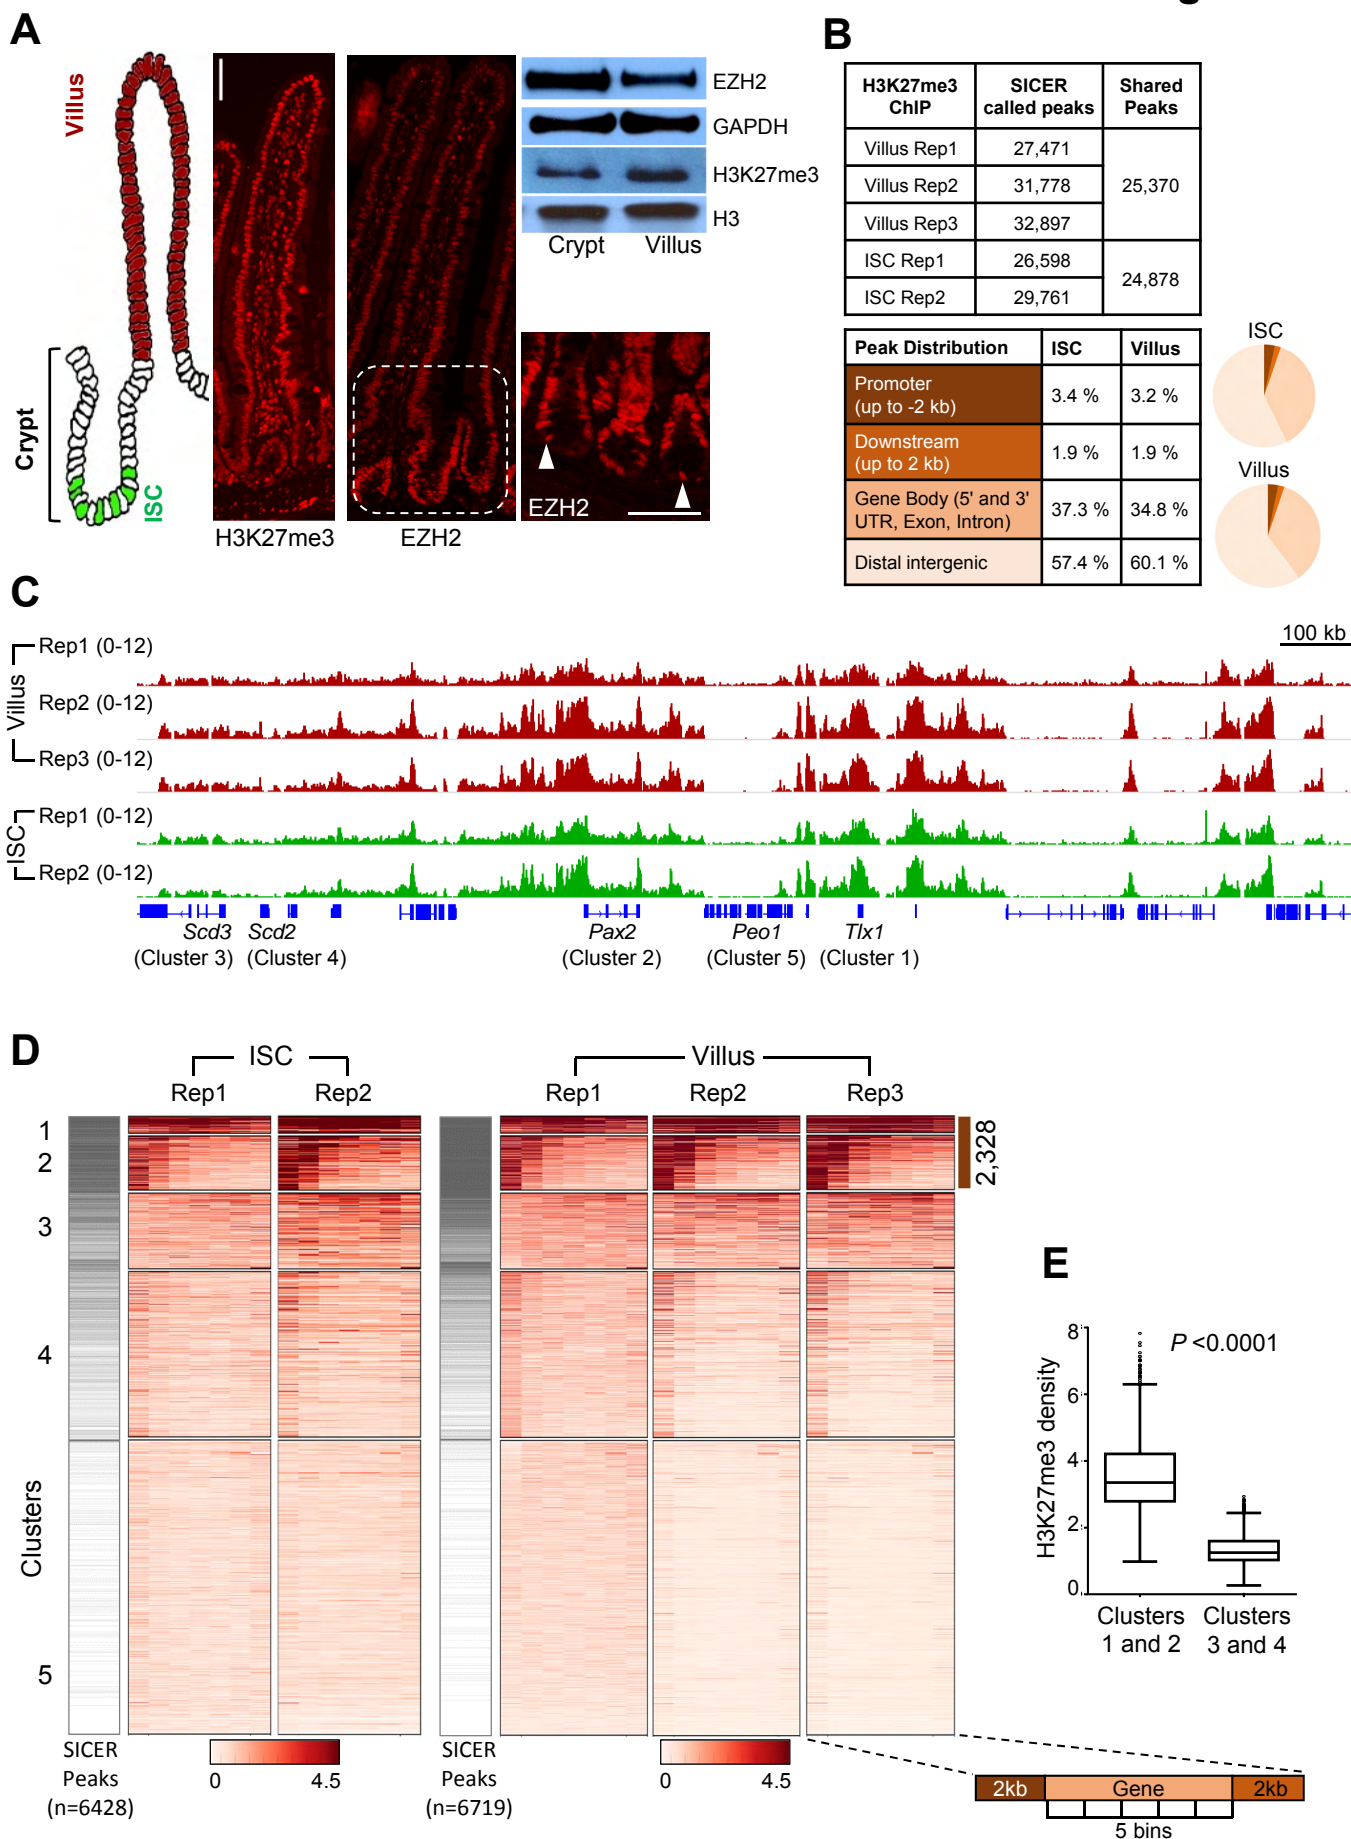

Supplement: NIHMS778543-supplement-1.pdf [file NIHMS778543-supplement-1.pdf]

Figure S2

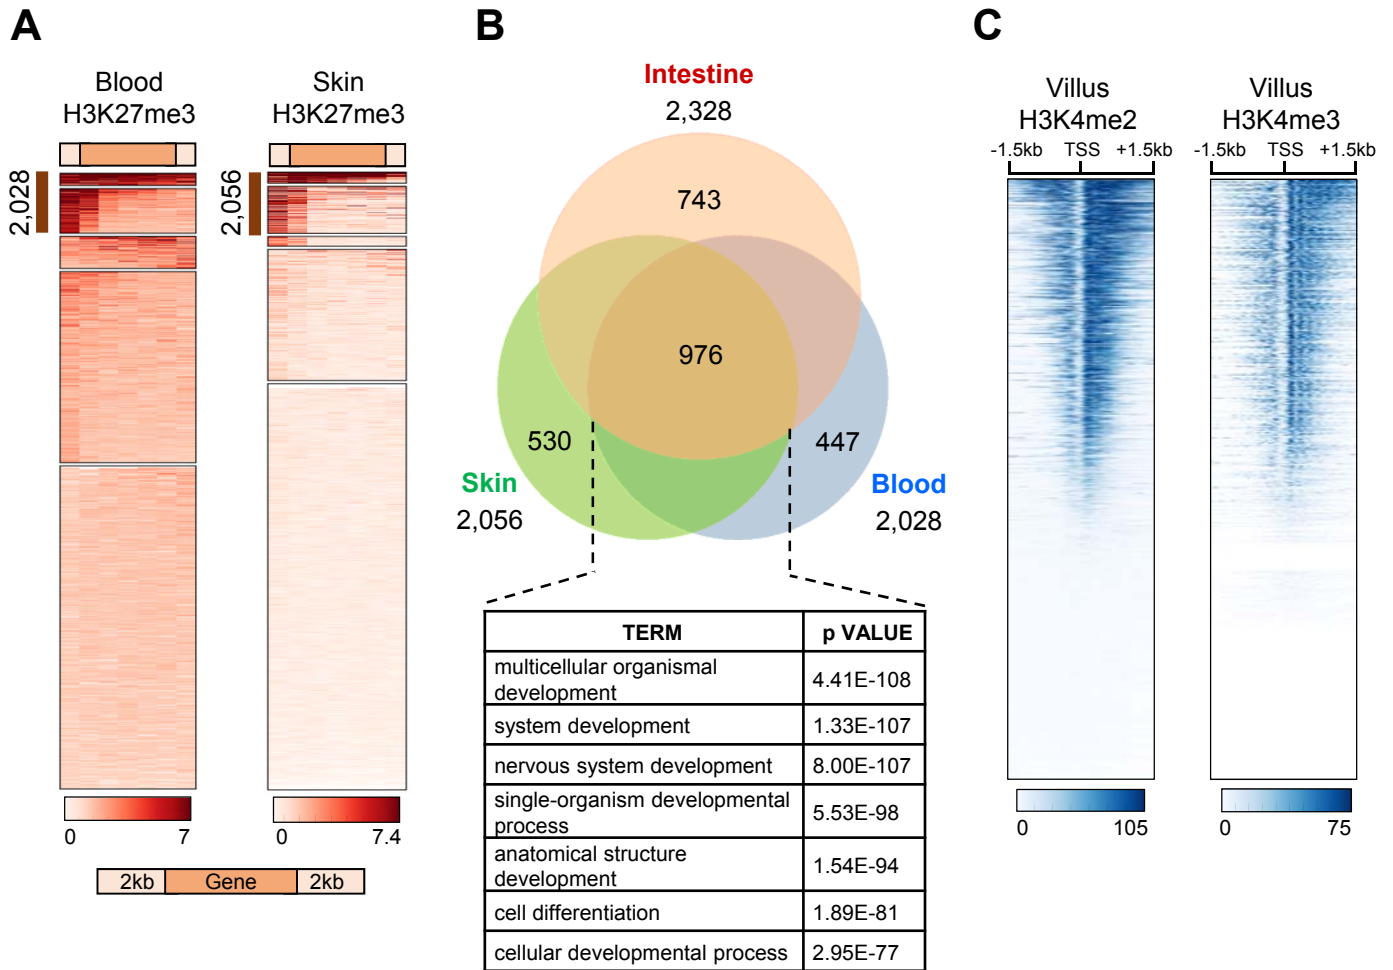

Supplement: NIHMS778543-supplement-2.pdf [file NIHMS778543-supplement-2.pdf]

**Figure S3**

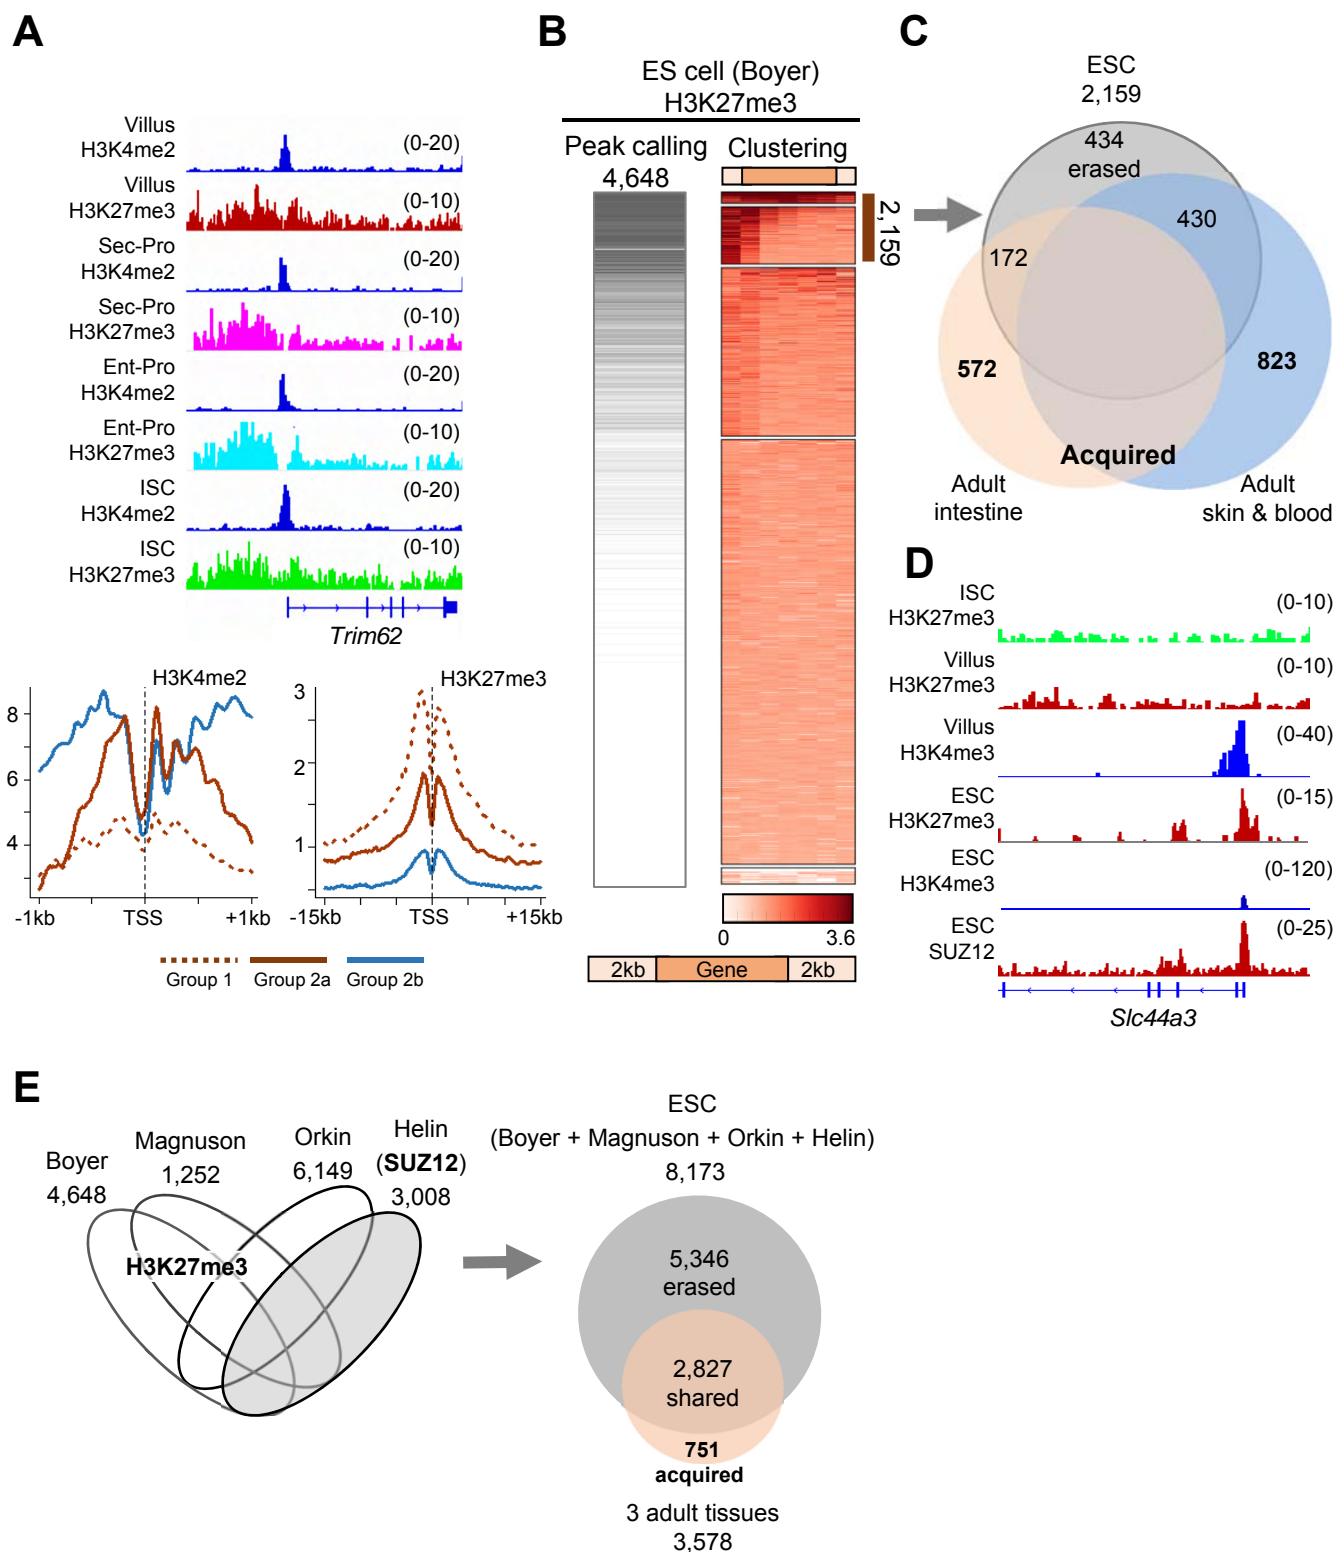

Supplement: NIHMS778543-supplement-3.pdf [file NIHMS778543-supplement-3.pdf]

# Figure S4

## A

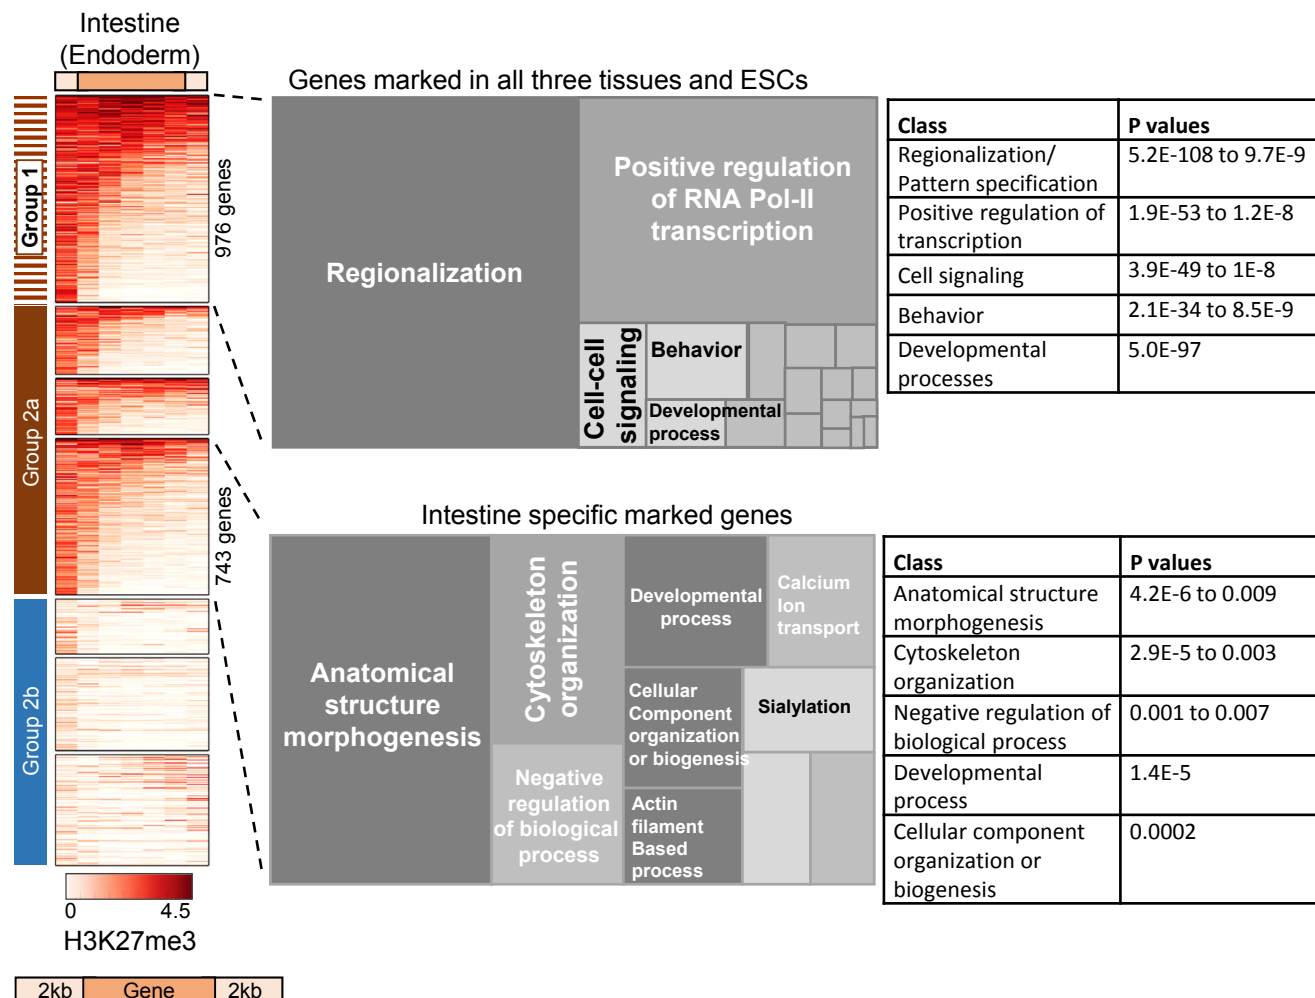

## B

Blood specific marked genes

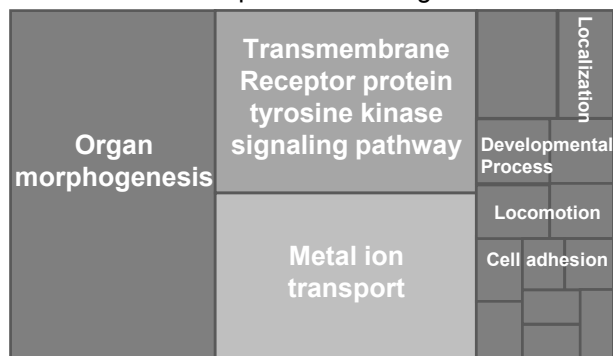

Skin specific marked genes

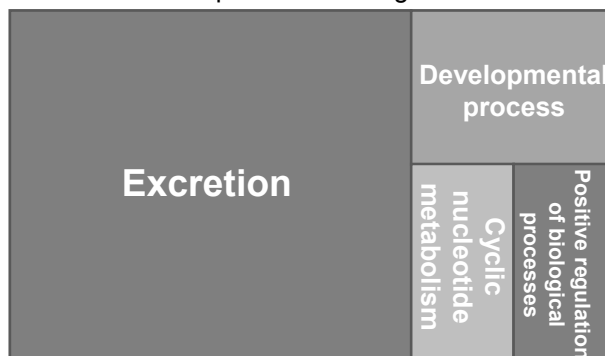

Supplement: NIHMS778543-supplement-4.pdf [file NIHMS778543-supplement-4.pdf]

Figure S5

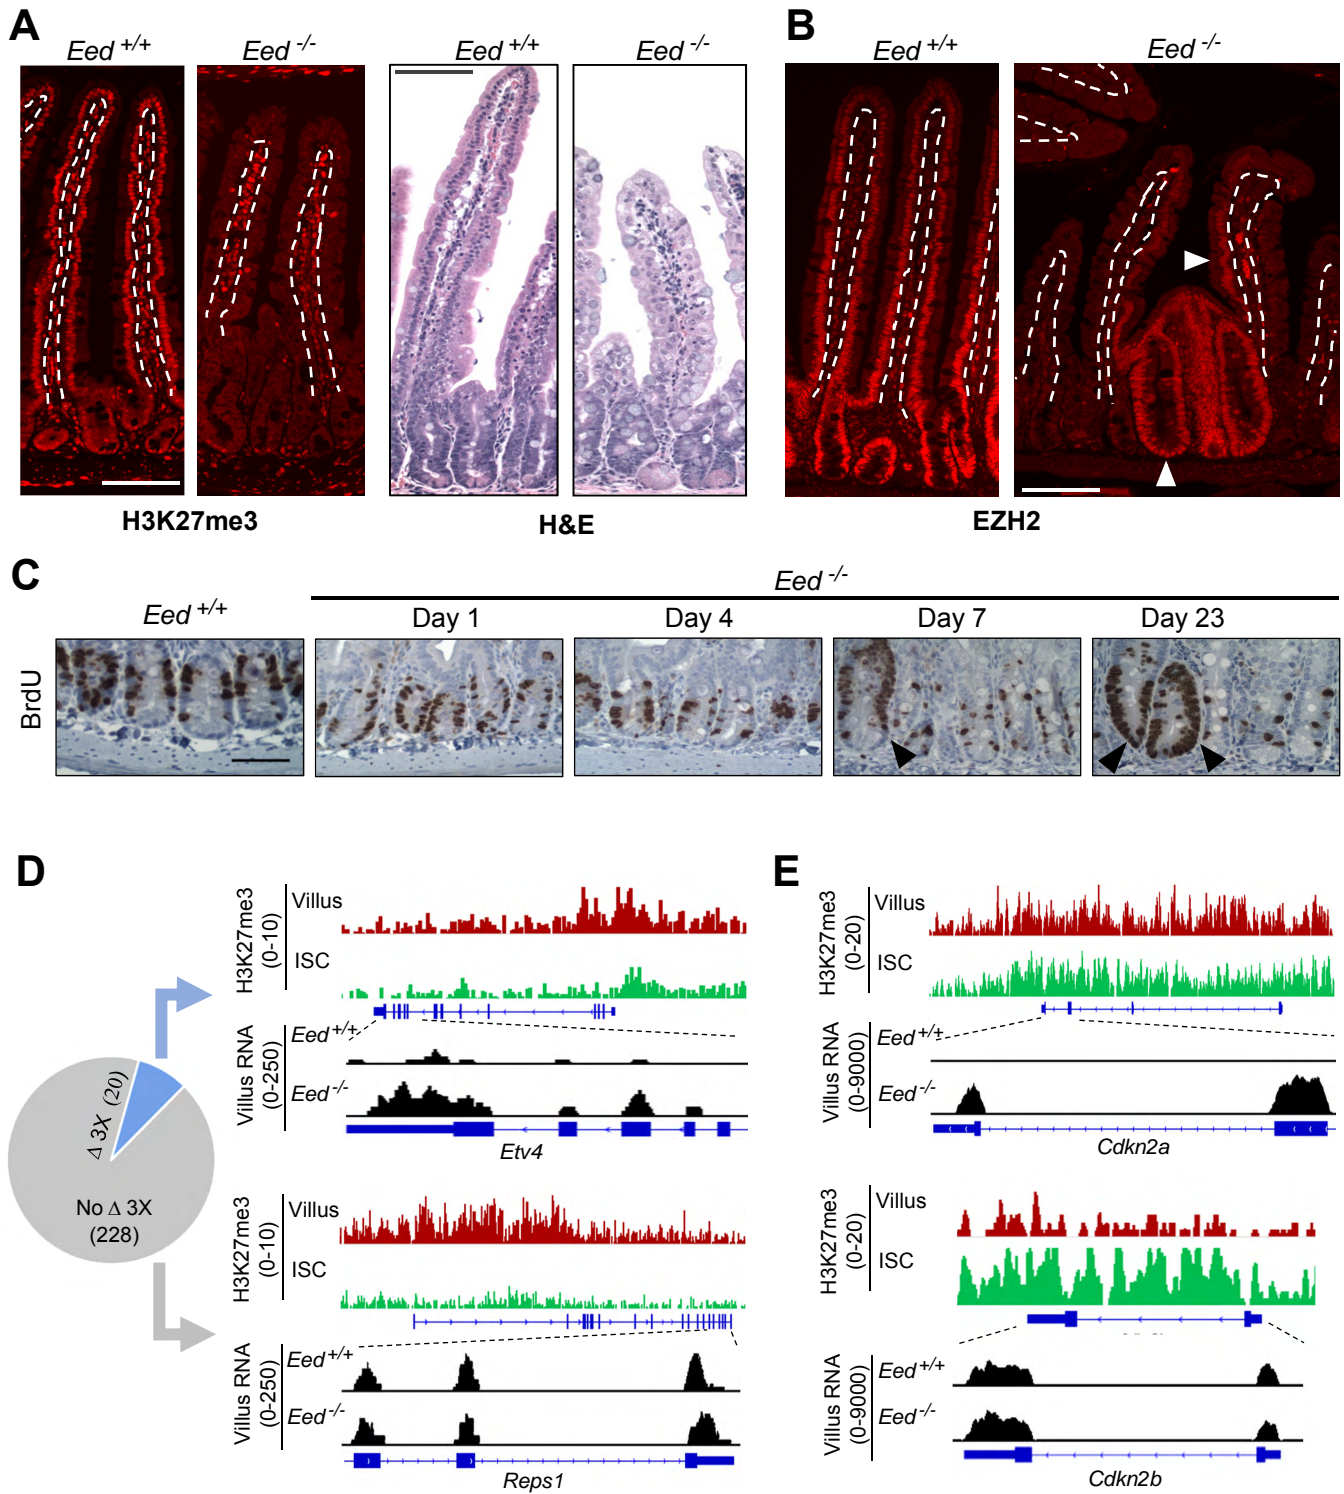

Supplement: NIHMS778543-supplement-5.pdf [file NIHMS778543-supplement-5.pdf]

Figure S6

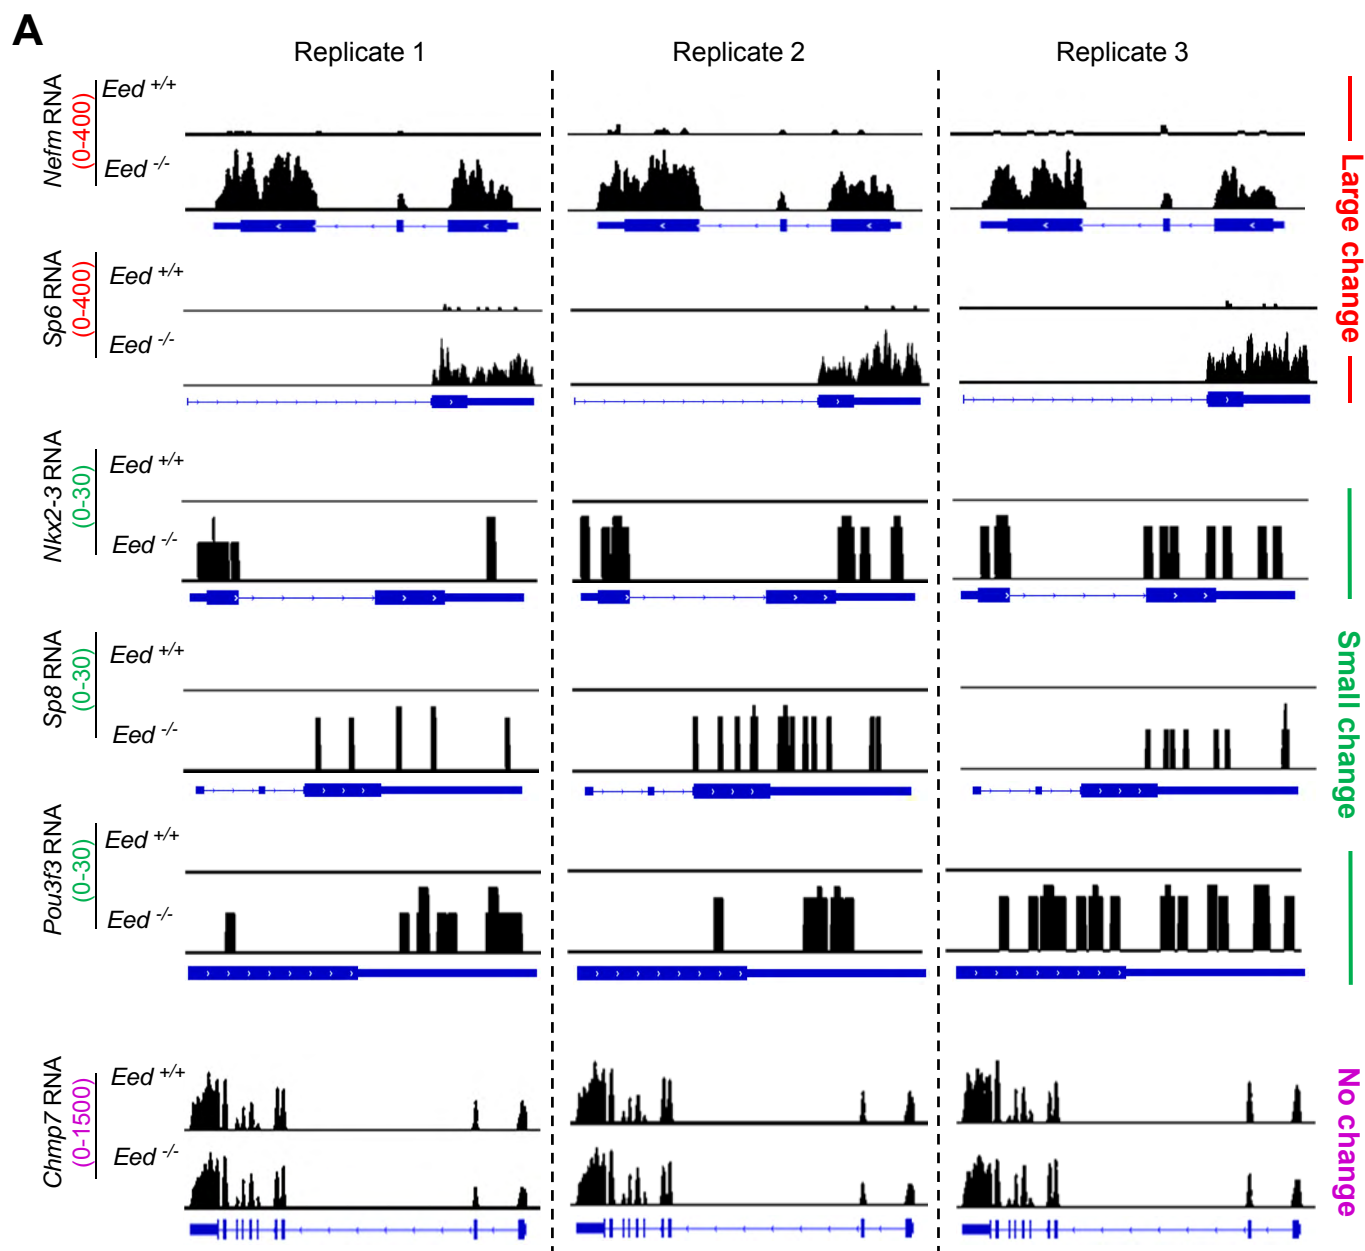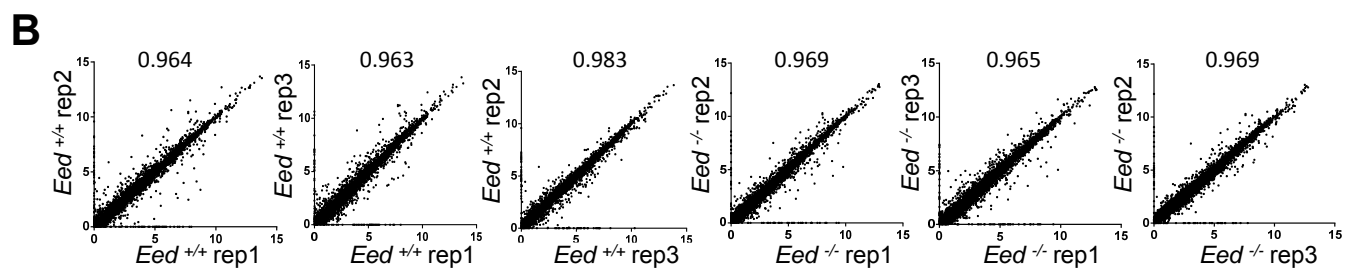

Supplement: NIHMS778543-supplement-6.pdf [file NIHMS778543-supplement-6.pdf]

Figure S7

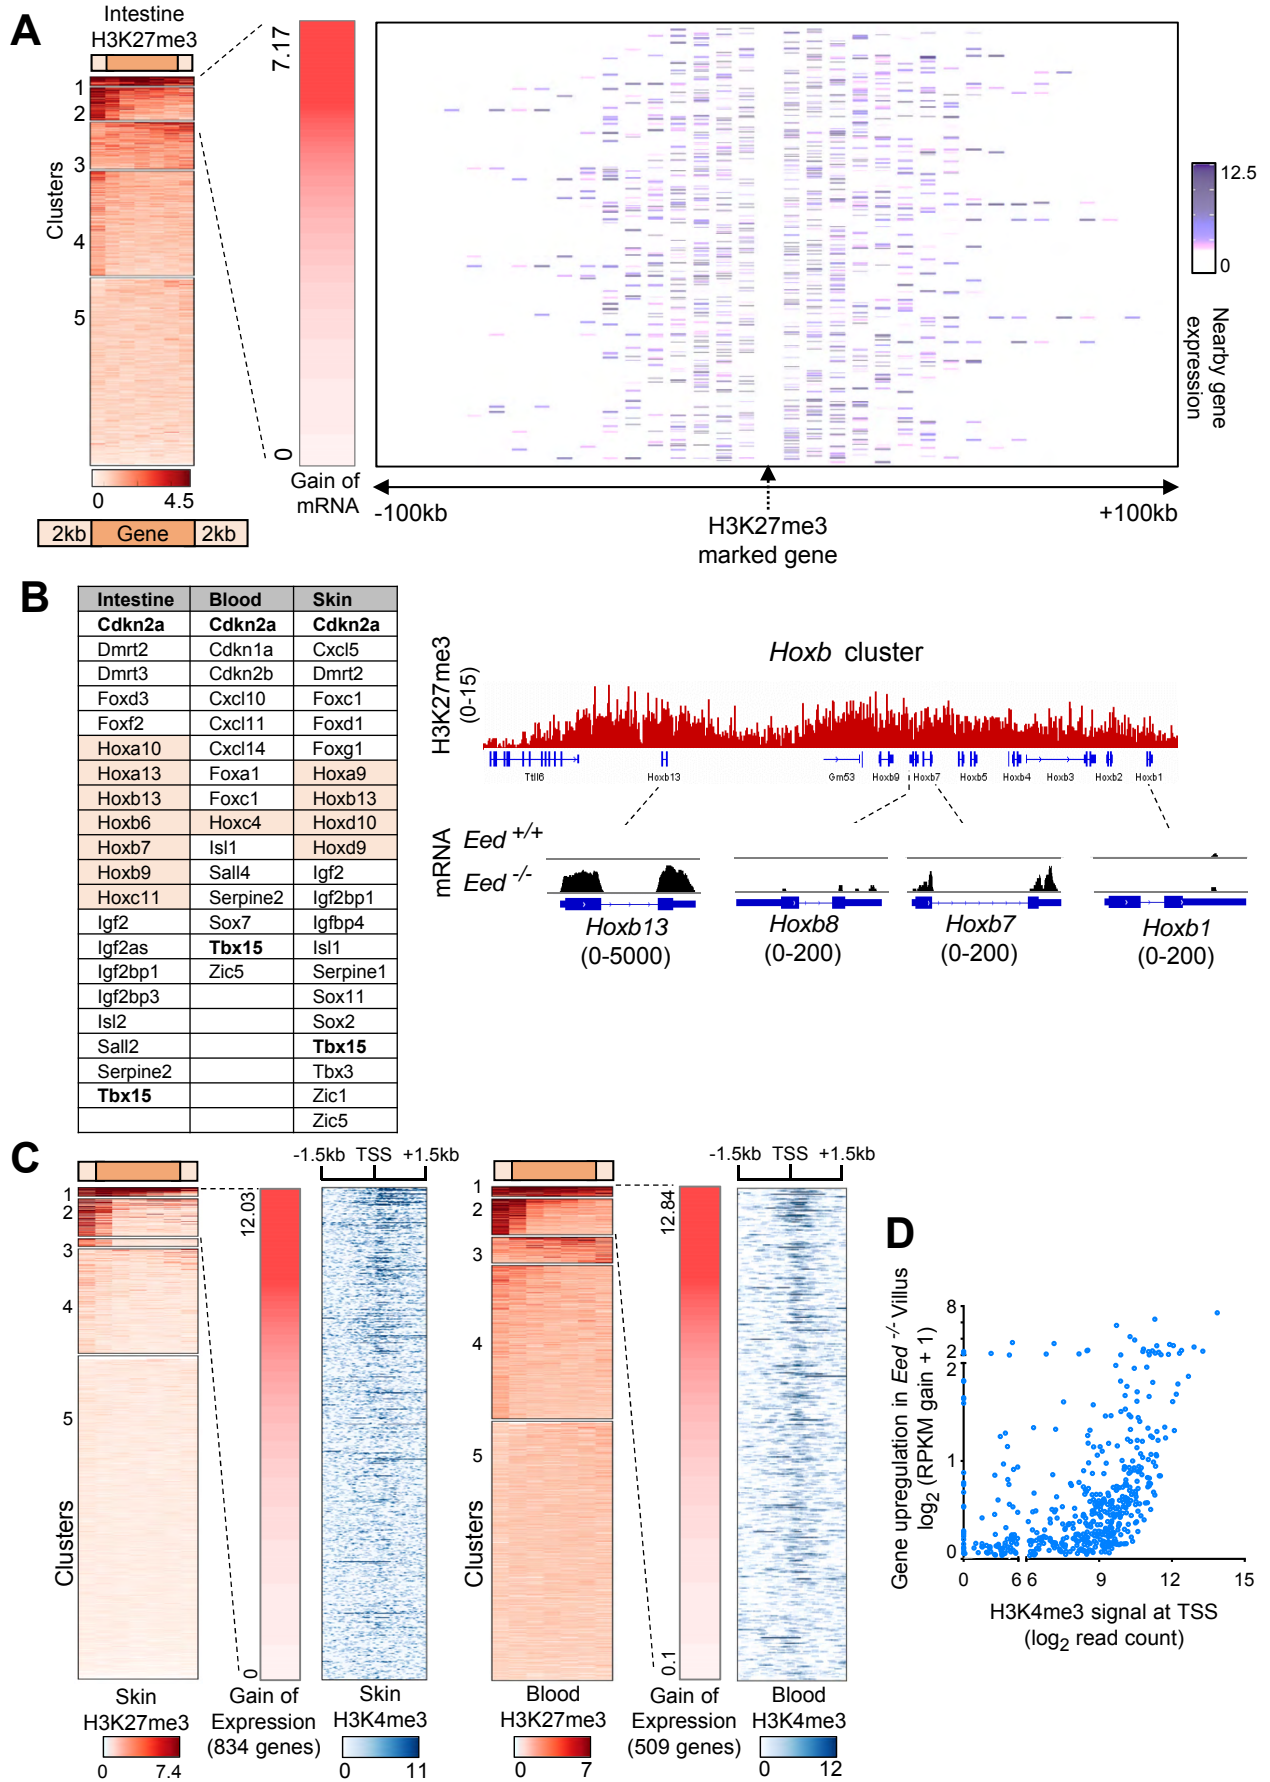

Supplement: NIHMS778543-supplement-7.pdf [file NIHMS778543-supplement-7.pdf]
